# Supplementary material
Source: HighWire-hosted journal article supplement (https://www.cmajopen.ca/highwire/filestream/88066/field_highwire_adjunct_files/1/open-2021-0216-original-submission.pdf)
Supplement: open-2021-0216-original-submission.pdf [file open-2021-0216-original-submission.pdf]

**LESS ORGAN DYSFUNCTION AND LOWER MORTALITY IN WAVE 3 THAN IN  
WAVES 1 AND 2 OF HOSPITALIZED COVID-19 PATIENTS IN CANADA**

**TERRY LEE, PHD (1), MATTHEW P. CHENG, MD (2), DONALD C. VINH (2),  
TODD C. LEE, MD (2), KAREN C. TRAN, MD (3), BRENT W. WINSTON, MD (4),  
DAVID SWEET, MD (5), JOHN H. BOYD, MD (6,7), KEITH R. WALLEY, MD (6,7),  
GREG HALJAN, MD (8), ALLISON MCGEER, MD (9),  
FRANCOIS LAMONTAGNE, MD (10), ROBERT FOWLER, MD (11),  
NATALY FARSHAIT, M Sc (12), DAVID MASLOVE, MD (13), JOEL SINGER, PHD (1),  
DAVID M. PATRICK, MD (14), JOHN C. MARSHALL, MD (15),  
KEVIN D. BURNS, MD (16), SRINIVAS MURTHY, MD (17),  
PUNEET K. MANN (18) M Sc, GERALDINE HERNANDEZ B Sc (18)  
KATHRYN DONOHOE BSc (18), GENVIEVE ROCHELEAU, M Sc (18),  
JAMES A. RUSSELL, MD (6,7)  
For ARBs CORONA I**

Conception and design: TL, JS, KCT, PKM, KD, GH, JAR.

Analysis: TL

Interpretation: TL, MPC, DCV, TCL, KCT, BBW, DS, JHB, KRW, GH, AM, FL, RF, NF, DM,  
JS, DMP, JCM, KDB, SM, PKM, GH, KD, GR, JAR.

Drafting the manuscript for important intellectual content: TL, MPC, DCV, TCL, KCT, BBW,  
DS, JHB, KRW, GH, AM, FL, RF, NF, DM, JS, DMP, JCM, KDB, SM, PKM, GH, KD, GR,  
JAR.

**Author affiliations:**

1. Centre for Health Evaluation and Outcome Science (CHEOS),  
St. Paul's Hospital,

1  
2  
3 University of British Columbia,  
4  
5 1081 Burrard Street,  
6  
7  
8 Vancouver, BC, Canada V6Z 1Y6.  
9

10 2. Division of Infectious Diseases, Department of Medicine,  
11  
12 McGill University Health Centre,  
13  
14 Montreal, PQ, Canada.  
15  
16

17 3. Division of General Internal Medicine  
18

19 Vancouver General Hospital,  
20  
21 2775 Laurel St,  
22  
23 Vancouver, BC Canada V5Z 1M9  
24  
25 University of British Columbia,  
26  
27  
28 Vancouver, BC, Canada.  
29

30 4. Departments of Critical Care Medicine, Medicine and Biochemistry and Molecular Biology,  
31

32 Foothills Medical Centre,  
33  
34 1403 29 Street NW,  
35  
36  
37 Calgary, Alta., Canada  
38  
39 University of Calgary,  
40  
41  
42 Calgary, Alta., Canada.  
43

44 **5. Division of Critical Care Medicine**  
45

46 Vancouver General Hospital,  
47  
48 2775 Laurel St,  
49  
50  
51 Vancouver, BC Canada V5Z 1M9  
52  
53 University of British Columbia,  
54  
55  
56  
57  
58  
59  
60

1  
2  
3 Vancouver, BC, Canada.  
4

5 6. Centre for Heart Lung Innovation,  
6

7 St. Paul's Hospital,  
8

9 University of British Columbia,  
10

11 1081 Burrard Street,  
12

13 Vancouver, BC, Canada V6Z 1Y6.  
14

15 7. Division of Critical Care Medicine  
16

17 St. Paul's Hospital,  
18

19 University of British Columbia,  
20

21 1081 Burrard Street,  
22

23 Vancouver, BC, Canada V6Z 1Y6.  
24

25 8. Department of Medicine,  
26

27 Surrey Memorial Hospital,  
28

29 13750 96th Avenue,  
30

31 Surrey, B.C. Canada V3V 1Z2  
32

33 9. Mt. Sinai Hospital,  
34

35 600 University Avenue,  
36

37 Toronto, Ontario, Canada M5G 1X5  
38

39 and University of Toronto  
40

41 Toronto, Ont., Canada  
42

43 10. University of Sherbrooke,  
44

45 Sherbrooke, Quebec, Can.  
46

47 11. Sunnybrook Health Sciences Centre,  
48

1  
2  
3 2075 Bayview Avenue,  
4  
5 Toronto, Ont., Canada M4N 3M5.  
6

7 12. Humber River Hospital,  
8  
9 1235 Wilson Ave  
10  
11 Toronto, Ont., Canada M3M 0B2.  
12  
13

14 13. Department of Critical Care,  
15  
16 Kingston General Hospital and Queen's University  
17  
18 76 Stuart Street  
19  
20  
21 Kingston, Ontario, Canada K7L 2V7.  
22

23 14. British Columbia Centre for Disease Control (BCCDC) and  
24  
25 University of British Columbia,  
26  
27 655 West 12th Avenue  
28  
29 Vancouver, BC, Canada V5Z 4R4  
30  
31

32 15. Department of Surgery,  
33  
34 St. Michael's Hospital,  
35  
36 30 Bond Street,  
37  
38 Toronto, Ontario, Canada M5B 1W8  
39  
40  
41

42 16. Division of Nephrology,  
43  
44 Department of Medicine,  
45  
46 The Ottawa Hospital Research Institute,  
47  
48 University of Ottawa,  
49  
50 1967 Riverside Dr., Rm. 535  
51  
52  
53 Ottawa, Ont., Canada K1H 7W9.  
54  
55  
56  
57  
58  
59  
60

1  
2  
3 17. BC Children's Hospital,  
4  
5 4500 Oak Street,  
6  
7  
8 Vancouver, BC, Canada V6H 3N1  
9  
10 University of British Columbia,  
11  
12 Vancouver, BC, Canada.  
13

14 18. Black Tusk Research Group,  
15  
16 Vancouver, BC, Canada  
17  
18  
19  
20

21 **Address for Correspondence:**

22  
23 James A. Russell,  
24  
25 Centre for Heart Lung Innovation,  
26  
27 St. Paul's Hospital,  
28  
29 University of British Columbia,  
30  
31 1081 Burrard Street,  
32  
33 Vancouver, BC, Canada V6Z 1Y6.  
34  
35  
36

37 Email : [Jim.Russell@hli.ubc.ca](mailto:Jim.Russell@hli.ubc.ca)  
38  
39  
40  
41

42 **Key Words:** coronavirus, COVID-19, wave, mortality, ventilation, vasopressors, renal  
43  
44 replacement therapy,  
45

46 **Word count:** 2492  
47

48 **Abstract word count:** 289  
49

50 **Figures:** 2  
51

52 **Tables:** 3  
53  
54  
55  
56  
57  
58  
59  
60

1  
2  
3  
4 **Funding Statement:**  
5

6 This study is funded by a grant from the Canadian Institutes of Health Research (CIHR #439993)  
7  
8 to James A. Russell and St. Paul’s Hospital Foundation to James A. Russell.  
9

10  
11 John Boyd is a recipient of a Providence Health Care Research Scholarship.  
12

13 Keith Walley is supported by Canadian Institutes of Health Research (CIHR) Foundation Grant  
14  
15 FDN 154311.  
16

17  
18 Donald Vinh is supported by the Fonds de recherche du Québec – Santé Clinician-Scientist  
19  
20 scholar program.  
21

22  
23 Srinivas Murthy is supported by the Health Research Foundation and Innovative Medicines  
24  
25 Canada Chair in Pandemic Preparedness Research  
26

27  
28  
29 **Declaration of competing interests:**  
30

31 See page 27.  
32  
33  
34  
35  
36  
37  
38  
39  
40  
41  
42  
43  
44  
45  
46  
47  
48  
49  
50  
51  
52  
53  
54  
55  
56  
57  
58  
59  
60

## ABSTRACT

**Background:** The COVID-19 epidemic grows and there have now been multiple waves in many countries. However, it is unknown whether mortality and organ dysfunction differ between waves.

**Methods** This is a sub-study of ARBs CORONA I, a multicentre Canadian pragmatic observational cohort study of adults hospitalized with acute COVID-19. The onset and end of waves 1, 2 and 3 were determined for the provinces of British Columbia, Ontario and Quebec in Canada using provincial health data. Unadjusted and adjusted generalized linear regression were used to compare 28-day and in-hospital mortality and use of invasive mechanical ventilation, vasopressors and renal replacement therapy between waves.

**Results** 520, 572 and 245 patients in waves 1, 2 and 3 respectively from nine sites were included. Patients in wave 3 were generally younger and had fewer co-morbidities. Unadjusted 28-day mortality rate was significantly lower in wave 3 (7.8%) compared to waves 2 (16.3%) and 1 (18.3%), and the difference remained significant in the adjusted analyses (OR (95% CI): wave 3 vs.1: 0.46 (0.26, 0.81), wave 3 vs 2: 0.52 (0.29, 1.91), wave 2 vs. 1: 0.89 (0.61, 1.29)). Compared to wave 1, after adjusting for difference in baseline characteristics, use of ventilation or vasopressors were less common in waves 2 and 3, while use of renal replacement therapy was less in wave 3. Possible mechanisms are unknown but include patient selection and residual differences in patient demographics and characteristics, differential use of effective therapies (e.g. dexamethasone), changes in SARS-CoV-2 (variants of concern) or roll out of the vaccination program.

**Interpretation:** There was progressively decreasing severity with waves among hospitalized adult patients with COVID-19, evidenced by lower mortality and use of organ-supportive

1  
2  
3  
4  
5  
6  
7  
8  
9  
10  
11  
12  
13  
14  
15  
16  
17  
18  
19  
20  
21  
22  
23  
24  
25  
26  
27  
28  
29  
30  
31  
32  
33  
34  
35  
36  
37  
38  
39  
40  
41  
42  
43  
44  
45  
46  
47  
48  
49  
50  
51  
52  
53  
54  
55  
56  
57  
58  
59  
60

therapy. Changes in at-risk group and management strategies may explain these improved outcomes.

**Word count:** 289

**Registration:** ClinicalTrials.gov Identifier is: NCT04510623

Confidential



## INTRODUCTION

The COVID-19 pandemic now has three waves in Canada. Epidemics generally spread through a succession of waves that reflect factors on multiple timescales.

Differences in outcomes among waves could be due to differences in patient demographics and characteristics (e.g. age, co-morbidities), viral characteristics (e.g. viral load, infectivity, toxicity and variants of concern), host characteristics (e.g. immunity, genetics(1)), resources (hospital and ICU beds), and treatments (medications and ventilation therapies). Studies in different countries reveal differences in case numbers across various waves but to date, there are no reports of how hospitalized patients with acute COVID-19 differ in organ dysfunction and use of organ-supporting care such as ventilation, vasopressors and renal replacement therapy (RRT) across waves. Furthermore, differences in baseline characteristics of patients across waves would necessitate adjusted analyses but not all studies have done such analyses. Thus, it is unknown whether organ dysfunction and mortality – adjusted for baseline risk such as age and co-morbidities - differ between waves.

Our hypothesis was that there are differences in patient characteristics, mortality and use of ventilation, vasopressors and RRT among adults hospitalized with acute COVID-19 across waves 1, 2 and 3 in Canada.

## METHODS

*Ethics*

1  
2  
3 This study was approved by Providence Health Care and the University of British Columbia  
4 Human Research Committee and by each of the contributing clinical sites. Anonymized clinical  
5 data and use of discarded plasma from clinical blood tests were deemed low risk and informed  
6 consent was deemed not necessary for this research.  
7  
8  
9  
10  
11  
12  
13

#### 14 *Patient Selection Criteria*

15  
16 This is a sub-study of ARBs CORONA I(2), a multicentre Canadian pragmatic observational  
17 cohort study to examine association of pre-existing use of angiotensin receptor blockers and  
18 patient outcomes. Inclusion criteria were individuals over 18 years of age who had confirmed  
19 COVID-19 infection (according to local hospital or provincial laboratories clinically approved  
20 laboratory testing for SARS-CoV-2) who were admitted to hospital for acute COVID-19. We  
21 excluded acute COVID-19 readmissions, Emergency Room admissions without hospitalization  
22 and those admitted to hospital with positive SARS-CoV-2 test but their acute illness was not due  
23 to acute COVID-19. The Alberta site in ARBs CORONA I was different from other  
24 participating sites in that it only enrolled patients who were admitted to ICU. As such,  
25 comparisons between waves would be confounded by the percentage of patients coming from the  
26 Alberta site in each wave. We thus excluded patients from the Alberta site in the current analysis  
27  
28  
29  
30  
31  
32  
33  
34  
35  
36  
37  
38  
39  
40  
41  
42 **(Appendix S1).**  
43  
44  
45  
46

47 Definitions of waves 1, 2 and 3 in the provinces of British Columbia (BC), Ontario and Quebec  
48 were derived from Canadian national reports (<https://health-infobase.canada.ca/covid-19/epidemiological-summary-covid-19-cases.html>) by visual examination of daily case count for  
49  
50  
51  
52  
53  
54  
55  
56  
57  
58  
59  
60

1  
2  
3 each province (**Figure 1**). Two authors (TL and JAR) independently reviewed the national report  
4  
5 to determine the timing of each wave. Differences were resolved by consensus.  
6  
7

### 8 9 10 *Baseline Characteristics*

11 Age, sex, presence of co-morbidities, heart rate, respiratory rate, temperature, blood pressure,  
12  
13 arterial oxygen saturation (SaO<sub>2</sub>), serum creatinine, and use of oxygen were recorded at baseline  
14  
15 (study enrollment).  
16  
17

### 18 19 20 21 *COVID-19 Therapies*

22 We recorded use of COVID-19 vaccines, corticosteroids and anti-viral agents during the hospital  
23  
24 course. Use of hydroxychloroquine, interleukin 6 inhibitors and therapeutic anticoagulation were  
25  
26 not systematically captured.  
27  
28  
29

### 30 31 32 33 *Outcomes*

34 28-day and in-hospital mortality were recorded. For patients discharged alive prior to day 28  
35  
36 and subsequently lost to follow up, they were assumed to be survivors at day 28.  
37  
38

39  
40  
41  
42 Organ dysfunction was scored as the use of invasive mechanical ventilation, vasopressors and RRT  
43  
44 and as days alive and free (DAF) of invasive mechanical ventilation, vasopressors and RRT.  
45  
46 Mortality is a competing risk for the calculation of DAF of vasopressors, ventilation and RRT  
47  
48 because mortality rates over the observation period are high. To increase the penalty for non-  
49  
50 survival, DAF of ventilation, vasopressors, and RRT (over 14 days) were summed and all non-  
51  
52 survivors over the observation period were assigned zero vasopressor, ventilation and RRT-free  
53  
54  
55  
56  
57  
58  
59  
60

1  
2  
3 days(6). DAF of vasopressors, ventilation and RRT for survivors was calculated by subtracting  
4 number of days with use for vasopressors, ventilation and RRT from 14. A high DAF score  
5 indicates less organ dysfunction.  
6  
7  
8  
9

### 10 11 12 *Statistical Analyses*

13  
14 Baseline characteristics were compared between waves using Chi-square test, Fisher's exact test,  
15 ANOVA or Kruskal–Wallis test as appropriate. Unadjusted and adjusted regression analyses  
16 (adjusting for pre-defined adjustment factors in ARBs CORONA I, including age, sex, co-  
17 morbidities (chronic heart disease, hypertension, chronic kidney disease and diabetes; the  
18 commonest co-morbidities of COVID-19 (3-5) associated with increased risk of ICU admission  
19 and death(5)) and baseline systolic blood pressure, plus potential confounders of organ  
20 dysfunction that were different across waves: baseline heart rate, SaO<sub>2</sub> and creatinine) were  
21 done to compare outcomes across waves. Logistic regression was used to compare 28-day and  
22 in-hospital mortality, and ever-ventilated, ever-used vasopressors or ever-received RRT during  
23 hospitalization or during the first 14 days between the three waves. Results were expressed as  
24 odds ratio (OR). DAF between waves was compared using 0-1 inflated beta regression as the  
25 observed data has a U-shape distribution. DAF was expressed as proportion of days (i.e.,  
26 divided by 14) in the regression model and then back transformed for interpretation. Results  
27 were expressed as mean difference (MD) in DAF. Adjusted analysis for DAF RRT was not  
28 feasible numerically as too few patients used RRT during the first 14 days. Within each  
29 regression model, the outcome was compared between pair of waves (2 vs. 1, 3 vs. 1 and 3 vs. 2)  
30 by testing the appropriate contrast. We accounted for site effect in all regression analyses  
31 (unadjusted and adjusted) as the regional distribution of patients was different across waves due  
32  
33  
34  
35  
36  
37  
38  
39  
40  
41  
42  
43  
44  
45  
46  
47  
48  
49  
50  
51  
52  
53  
54  
55  
56  
57  
58  
59  
60

1  
2  
3 to varying level of site participation over time. For logistic regression, site was considered as a  
4  
5 random effect. For 0-1 inflated beta regression, site effect was considered as fixed instead of  
6  
7 random due to numerical issues and computational limitations.  
8  
9

10  
11  
12 Missing data was minimal for the outcomes considered and thus patients with missing data were  
13  
14 simply excluded from the corresponding analysis. Analyses were conducted using SAS 9.4 (SAS  
15  
16 Institute Inc., Cary, NC) and R 4.0.4 (R Foundation for Statistical Computing, Vienna, Austria).  
17  
18  
19 P <0.05 was considered statistically significant.  
20  
21

## 22 23 24 **Results**

25  
26 A total of 1337 evaluable patients admitted from March 2, 2020 to April 14, 2021 were included  
27  
28 in the current analysis. There were 520 (38.9%), 572 (42.8%) and 245 (18.3%) patients in waves  
29  
30 1, 2 and 3 respectively (**Figure 1**). The regional distribution of enrolled patients varied across  
31  
32 waves due to varying level of site participation, with Ontario contributing few patients in wave 1  
33  
34 and Quebec contributing almost no patients after wave 1.  
35  
36  
37

38  
39  
40 There were many significant differences in baseline characteristics among patients in waves 1, 2  
41  
42 and 3 at baseline. Patients in wave 3 were younger (mean: 63.3, 65.8 and 70.2 years in waves 3,  
43  
44 2 and 1 respectively,  $p < 0.001$ ), were more likely to be healthy with fewer co-morbidities (60.7%,  
45  
46 67.0% and 71.4% in waves 3, 2 and 1 respectively for any of chronic cardiac disease,  
47  
48 hypertension, chronic kidney disease, and diabetes,  $p = 0.011$ ), especially chronic cardiac disease  
49  
50 (19%, 25% and 32.1% in waves 3, 2 and 1 respectively,  $p < 0.001$ ) (**Table 1**). There were  
51  
52  
53  
54  
55  
56  
57  
58  
59  
60

1  
2  
3 significantly more patients with dementia in the first wave, likely due to outbreaks in long term  
4 care facility during the first wave.  
5  
6  
7  
8  
9

10 Treatments differed across waves. Lopinavir/ritonavir was used in 2.5% of patients in wave 1  
11 and none in waves 2 and 3, while use of remdesivir increased from 1.6% to 16.9% from wave 1  
12 to 2, but then dropped to 9.8% in wave 3.  
13  
14  
15  
16  
17  
18

19 Use of corticosteroid increased over time, with 30.8%, 87.2% and 91% from wave 1 to 3.  
20  
21 Importantly, use of dexamethasone increased from 10.8% of patients in wave 1 to 84.3% and  
22 89% of patients in waves 2 and 3 respectively (**Table 2**). Initiation of dexamethasone was also  
23  
24 sooner in latter waves. Among patients ever on dexamethasone during hospitalization, 42.6%,  
25  
26 63.8% and 67.5% initiated treatment on hospital admission day ( $p=0.003$ ) and 72.2%, 89.1% and  
27  
28 93.3% initiated by day 1 ( $p<0.001$ ) in waves 1, 2 and 3 respectively.  
29  
30  
31  
32  
33  
34

35 28-day mortality rate was 18.3%, 16.3% and 7.8% in wave 1, 2 and 3 respectively. The rate was  
36  
37 significantly lower in wave 3 than waves 1 and 2 in both unadjusted and adjusted analysis  
38  
39 (adjusted OR (95% CI): 0.46 (0.26, 0.81),  $p=0.007$  for wave 3 vs 1 and 0.52 (0.29, 0.91),  
40  
41  $p=0.022$  for wave 3 vs 2; **Figure 2 and Table E1**). The findings for in-hospital mortality were  
42  
43 similar.  
44  
45  
46  
47  
48

49 Use of ventilation, vasopressors or RRT decreased over waves (**Table 3**). There was  
50  
51 significantly less use of ventilation during hospitalization in wave 3 compared to waves 1 and 2  
52  
53 (adjusted OR (95% CI): wave 3 vs. 1: 0.34 (0.22, 0.54),  $p<0.001$ ; wave 3 vs 2: 0.59 (0.38, 0.92),  
54  
55  
56  
57  
58  
59  
60

1  
2  
3 p=0.021) and in wave 2 compared to 1 (adjusted OR (95% CI): 0.58 (0.42, 0.80), p<0.001). Use  
4  
5 of vasopressors were less common in waves 2 and 3 compared to wave 1, but there was no  
6  
7 significant difference between waves 2 and 3 (**Figure 2 and Table E2**). The results regarding  
8  
9 differences between waves were similar for use of ventilation or vasopressors within the first 14  
10  
11 days (**Figure 2 and Table E3**). Use of RRT during hospitalization was significantly less in  
12  
13 wave 3 compared to wave 1 (**Figure 2 and Tables E2**).

14  
15  
16  
17  
18  
19 Significantly more DAF ventilation was observed in latter waves (adjusted MD (95% CI): wave  
20  
21 2 vs 1: 1.39 (0.29, 2.41), p<0.001; wave 3 vs. 1: 2.32 (1.28, 3.33), p<0.001; wave 3 vs. 2: 0.94  
22  
23 (0.14, 1.62), p=0.017) and also for DAF vasopressors (adjusted MD (95% CI): wave 3 vs. 1: 1.30  
24  
25 (0.20, 2.19), p<0.001; wave 3 vs. 2: 0.81 (0.05, 1.60), p=0.026). In contrast, DAF RRT was not  
26  
27 significantly different across waves (**Figure 2 and Tables E4**).

28  
29  
30  
31  
32  
33 Vaccines could mitigate severity of COVID-19; 24 (1.8%) patients (n=3 (0.5%) and 21 (8.6%) in  
34  
35 waves 2 and 3 respectively) had vaccines in our cohort before admission for acute COVID-19,  
36  
37 with 11 patients had the vaccine for more than 14 days prior to admission. However, these  
38  
39 numbers were too small to do analyses of the association of vaccines on outcomes between  
40  
41 waves 2 and 3.

## 42 43 44 45 46 47 **Interpretation**

48  
49 There were large differences in acute care outcomes between waves one, two and three in  
50  
51 patients hospitalized with acute COVID-19 in Canada. Mortality and use of ventilation,  
52  
53 vasopressors and RRT were significantly lower in wave three than wave one in unadjusted  
54  
55  
56  
57  
58  
59  
60

1  
2  
3 analyses and in analyses adjusted for potential confounders. We identified dramatically increased  
4 use of dexamethasone as a potential reason for better outcomes in later waves even in adjusted  
5  
6 analyses.  
7  
8  
9

10  
11  
12 Lower mortality and less need for ventilation, vasopressors and RRT in wave 3 vs. waves 1 and 2  
13  
14 could be due to differences in SARS-CoV-2 (viral load and frequency of variants of concern),  
15  
16 differences in patient severity of illness (e.g. due to better population immunity), differences in  
17  
18 treatment that could alter outcomes (e.g. vaccines, dexamethasone, tocilizumab), differences in  
19  
20 risk according to ethnicity or differences in ICU bed availability.  
21  
22  
23

24  
25  
26 Dexamethasone decreased mortality(7) and increased days alive and free of ventilation(8) in  
27  
28 COVID-19 trials. Dexamethasone could have decreased need for ventilation and perhaps  
29  
30 vasopressors in our study because use of dexamethasone increased dramatically from 10.8% of  
31  
32 patients in wave 1 to 84.3% and 89% of patients in waves 2 and 3 respectively when there was  
33  
34 less need for ventilation, vasopressors and renal replacement therapy. It is remarkable that use of  
35  
36 dexamethasone increased so rapidly and so dramatically in practice in Canada. We suspect that  
37  
38 the strikingly positive results of the pivotal trial of dexamethasone (decreased mortality and use  
39  
40 of ventilation) and the tremendous public and clinical awareness of the COVID-19 pandemic  
41  
42 drove this very rapid change in practice.  
43  
44  
45  
46  
47  
48

49  
50 Some studies also found decreased mortality in waves following the first wave of COVID-19(9,  
51  
52 10). In a 43-country study(10), there was lower mortality in the second wave than in the first  
53  
54 wave. Domingo and colleagues(11) found differences in mortality (double in wave 1 vs. wave 2)  
55  
56  
57  
58  
59  
60



1  
2  
3 accounted for by differences in ICU admission and use of ventilation. In a multi-country study of  
4 waves 1 and 2, ages were similar between waves but the proportion of deaths of nursing home  
5 residents decreased in most countries in the second wave(12). More anticoagulation and  
6 corticosteroids in wave two might have reduced mortality in hospitalized COVID-19 patients in  
7 Milan Italy(13). Similarly, in a region of Spain, patients from the second wave were more often  
8 treated with non-invasive mechanical ventilation and corticosteroids, and less often with invasive  
9 mechanical ventilation, usual oxygen therapy and anticoagulants(14). In contrast, other studies  
10 found increased mortality in later COVID-19 waves in Africa(15) and South Korea(16).  
11  
12  
13  
14  
15  
16  
17  
18  
19  
20  
21  
22  
23

24 In our study, we do not know if variants of concern in our patients played a role in decreasing  
25 need for ventilation and vasopressors in wave 3 compared to waves 1 and 2 because we did not  
26 measure SARS-CoV-2 genotype for variants of concern. Variants of concern increased in  
27 frequency in later waves in Italy (yet mortality was lower compared to the first wave(17)) and  
28 Japan(18, 19).  
29  
30  
31  
32  
33  
34  
35  
36  
37

38 We did not assess immunity in our patients so cannot determine whether immunity played a role  
39 in decreasing need for ventilation and vasopressors in wave 3 compared to waves 1 and 2.  
40  
41

42 Barallat and colleagues(20) found that seroprevalence of anti-SARS-CoV-2 IgG in the healthcare  
43 workers of Barcelona was higher than the general population in the same geographical area in  
44 wave one. Utrero-Rico and colleagues(21) showed that IL-6 levels predicted mortality in both  
45 the first and second waves of COVID-19 in Europe.  
46  
47  
48  
49  
50  
51  
52  
53  
54  
55  
56  
57  
58  
59  
60

1  
2  
3 Vaccines could also mitigate severity of COVID-19, but mass vaccination program in Canada  
4 did not roll out until later part of wave 2. The number of vaccinated patients in our cohort was  
5 too small to formally assess whether vaccines contributed to the difference in patient outcomes  
6 between waves.  
7  
8  
9  
10  
11  
12  
13

14 Starting in wave 2, and prominently in wave 3, health care providers became partially and  
15 sometimes fully vaccinated. We note anecdotally that health care providers attended patients at  
16 the bedside more frequently when the health care providers perceived that they were safer due to  
17 vaccination and availability of adequate PPE. This may have impacted patient outcomes.  
18  
19  
20  
21  
22  
23  
24  
25

26 There are limitations of our study. In this association study we cannot determine causation, but  
27 we do add further evidence regarding differences in characteristics, treatments and outcomes of  
28 patients in waves 1, 2 and 3. The regional distribution of enrolled patients also changed  
29 significantly across waves which could have confounded our results. Another potential limitation  
30 is inadequate sample size, particularly in wave 3, which limited our statistical power for the  
31 analysis. In addition, site selectivity is a limitation because our study was based mainly in  
32 tertiary centers participating in research. Our study did not require consent and research  
33 coordinators used SARS-CoV-2 positive tests in the hospital laboratory to find patients, but some  
34 patients may have been missed.  
35  
36  
37  
38  
39  
40  
41  
42  
43  
44  
45  
46  
47  
48

49 In conclusion, patients in wave 3 were younger and had fewer co-morbidities than patients in  
50 earlier waves and had lower mortality and needed less organ supporting care even after  
51  
52  
53  
54  
55  
56  
57  
58  
59  
60

1  
2  
3 accounting for these differences on age and co-morbidities. Changes in at-risk group and  
4  
5 management strategies (such as corticosteroids) may explain these improved outcomes.  
6  
7  
8  
9  
10  
11  
12  
13  
14  
15  
16  
17  
18  
19  
20  
21  
22  
23  
24  
25  
26  
27  
28  
29  
30  
31  
32  
33  
34  
35  
36  
37  
38  
39  
40  
41  
42  
43  
44  
45  
46  
47  
48  
49  
50  
51  
52  
53  
54  
55  
56  
57  
58  
59  
60

Confidential

**Table 1.** Baseline characteristics of patients admitted with acute COVID-19 overall and in waves 1, 2 and 3.

| Variable                                          | All (n=1337)    | 1st (n=520)    | Wave<br>2nd (n=572) | 3rd (n=245)    | P      |
|---------------------------------------------------|-----------------|----------------|---------------------|----------------|--------|
| Admission date, n (%)                             |                 |                |                     |                | -      |
| Mar 2020 - May 2020                               | 429 (32.1)      | 429 (82.5)     | 0 (0.0)             | 0 (0.0)        |        |
| Jun 2020 - Aug 2020                               | 34 (2.5)        | 34 (6.5)       | 0 (0.0)             | 0 (0.0)        |        |
| Sep 2020 - Nov 2020                               | 276 (20.6)      | 57 (11.0)      | 219 (38.3)          | 0 (0.0)        |        |
| Dec 2020 - Feb 2021                               | 386 (28.9)      | 0 (0.0)        | 353 (61.7)          | 33 (13.5)      |        |
| Mar 2021 - Apr 2021                               | 212 (15.9)      | 0 (0.0)        | 0 (0.0)             | 212 (86.5)     |        |
| COVID-19 confirmed status, n (%)                  |                 |                |                     |                | <0.001 |
| Positive - screening test                         | 82 (6.1)        | 67 (12.9)      | 13 (2.3)            | 2 (0.8)        |        |
| Positive - definitive test                        | 1255 (93.9)     | 453 (87.1)     | 559 (97.7)          | 243 (99.2)     |        |
| Positive for other pathogen, n (%)                | 11 (0.8)        | 9 (1.7)        | 2 (0.3)             | 0 (0.0)        | 0.016  |
| Sex, n (%)                                        |                 |                |                     |                | 0.263  |
| Unknown                                           | 1               | 1              | 0                   | 0              |        |
| Male                                              | 791 (59.2)      | 293 (56.5)     | 348 (60.8)          | 150 (61.2)     |        |
| Female                                            | 545 (40.8)      | 226 (43.5)     | 224 (39.2)          | 95 (38.8)      |        |
| Age                                               |                 |                |                     |                | <0.001 |
| Mean (SD)                                         | 67.0 (17.1)     | 70.2 (16.3)    | 65.8 (17.3)         | 63.3 (17.1)    |        |
| Range                                             | (20.0, 103.0)   | (23.0, 103.0)  | (20.0, 100.0)       | (23.0, 101.0)  |        |
| Co-morbidities, n (%) ^                           |                 |                |                     |                |        |
| Any of the four below                             | 899/1331 (67.5) | 370/518 (71.4) | 381/569 (67.0)      | 148/244 (60.7) | 0.011  |
| Chronic cardiac disease                           | 353/1324 (26.7) | 166/517 (32.1) | 141/565 (25.0)      | 46/242 (19.0)  | <0.001 |
| Chronic kidney disease                            | 199/1332 (14.9) | 82/519 (15.8)  | 94/570 (16.5)       | 23/243 (9.5)   | 0.029  |
| Hypertension                                      | 709/1330 (53.3) | 295/519 (56.8) | 299/569 (52.5)      | 115/242 (47.5) | 0.050  |
| Diabetes                                          | 424/1330 (31.9) | 170/518 (32.8) | 183/568 (32.2)      | 71/244 (29.1)  | 0.574  |
| Chronic pulmonary disease                         | 214/1327 (16.1) | 102/519 (19.7) | 81/567 (14.3)       | 31/241 (12.9)  | 0.018  |
| Liver disease                                     | 56/1331 (4.2)   | 21/517 (4.1)   | 21/570 (3.7)        | 14/244 (5.7)   | 0.400  |
| Chronic neurological disorder                     | 147/1330 (11.1) | 68/519 (13.1)  | 56/569 (9.8)        | 23/242 (9.5)   | 0.161  |
| Malignant neoplasm                                | 101/1324 (7.6)  | 43/517 (8.3)   | 36/564 (6.4)        | 22/243 (9.1)   | 0.318  |
| Chronic hematologic disease                       | 60/1330 (4.5)   | 30/518 (5.8)   | 25/569 (4.4)        | 5/243 (2.1)    | 0.068  |
| AIDS / HIV                                        | 10/1305 (0.8)   | 4/491 (0.8)    | 2/570 (0.4)         | 4/244 (1.6)    | 0.154  |
| Rheumatologic disorder                            | 150/1330 (11.3) | 41/517 (7.9)   | 76/570 (13.3)       | 33/243 (13.6)  | 0.009  |
| Dementia                                          | 154/1328 (11.6) | 100/516 (19.4) | 42/569 (7.4)        | 12/243 (4.9)   | <0.001 |
| Malnutrition                                      | 11/1331 (0.8)   | 8/517 (1.5)    | 3/570 (0.5)         | 0/244 (0.0)    | 0.062  |
| Admitted to ICU on hospital admission day, n (%)  | 218 (16.3)      | 104 (20.0)     | 83 (14.5)           | 31 (12.8)      | 0.012  |
| Organ support on admission day                    |                 |                |                     |                |        |
| Invasive mechanical ventilation, n (%)            | 102/1337 (7.6)  | 55/520 (10.6)  | 34/572 (5.9)        | 13/245 (5.3)   | 0.005  |
| RRT or dialysis, n (%)                            | 18/1320 (1.4)   | 8/511 (1.6)    | 7/567 (1.2)         | 3/242 (1.2)    | 0.881  |
| Vasopressors, n (%)                               | 81/1337 (6.1)   | 35/520 (6.7)   | 33/572 (5.8)        | 13/245 (5.3)   | 0.690  |
| Temperature (°C) - mean (SD)                      | 37.5 (0.9)      | 37.5 (0.9)     | 37.4 (0.9)          | 37.4 (0.8)     | 0.118  |
| Missing, n                                        | 31              | 19             | 9                   | 3              |        |
| Heart rate (beats per minute) - mean (SD)         | 94.2 (20.3)     | 91.4 (20.6)    | 95.5 (20.3)         | 97.4 (19.1)    | <0.001 |
| Missing, n                                        | 12              | 6              | 3                   | 3              |        |
| Respiratory rate (breaths per minute) - mean (SD) | 24.0 (7.3)      | 22.9 (6.4)     | 24.9 (7.9)          | 24.2 (7.5)     | <0.001 |
| Missing, n                                        | 24              | 15             | 5                   | 4              |        |
| sBP - mean (SD)                                   | 129.4 (22.7)    | 128.8 (22.9)   | 130.6 (23.4)        | 128.0 (20.5)   | 0.238  |
| Missing, n                                        | 9               | 2              | 5                   | 2              |        |
| dBp - mean (SD)                                   | 73.8 (12.6)     | 73.7 (11.9)    | 74.4 (13.2)         | 72.5 (12.5)    | 0.165  |
| Missing, n                                        | 25              | 3              | 14                  | 8              |        |

1  
2  
3  
4  
5  
6  
7  
8  
9  
10  
11  
12  
13  
14  
15  
16  
17  
18  
19  
20  
21  
22  
23  
24  
25  
26  
27  
28  
29  
30  
31  
32  
33  
34  
35  
36  
37  
38  
39  
40  
41  
42  
43  
44  
45  
46  
47  
48  
49  
50  
51  
52  
53  
54  
55  
56  
57  
58  
59  
60

| Variable                                             | All (n=1337)         | Wave                 |                      |                      | P      |
|------------------------------------------------------|----------------------|----------------------|----------------------|----------------------|--------|
|                                                      |                      | 1st (n=520)          | 2nd (n=572)          | 3rd (n=245)          |        |
| Oxygen saturation (SaO <sub>2</sub> ; %) - mean (SD) | 91.9 (7.2)           | 93.5 (4.2)           | 90.8 (8.6)           | 91.1 (7.9)           | <0.001 |
| Missing, n                                           | 17                   | 13                   | 2                    | 2                    |        |
| Required oxygen therapy, n (%)                       | 436/1290 (33.8)      | 186/516 (36.0)       | 174/541 (32.2)       | 76/233 (32.6)        | 0.376  |
| WBC count (x10 <sup>3</sup> /μL) - Median (IQR)      | 6.6 (4.9, 9.0)       | 6.5 (4.9, 8.6)       | 7.0 (5.1, 9.2)       | 6.4 (4.7, 9.1)       | 0.090  |
| Missing, n                                           | 27                   | 17                   | 6                    | 4                    |        |
| Haemoglobin (g/L) - Median (IQR)                     | 132.0 (117.0, 145.0) | 130.0 (118.0, 145.0) | 132.0 (117.0, 145.0) | 134.0 (119.0, 145.0) | 0.470  |
| Missing, n                                           | 26                   | 15                   | 7                    | 4                    |        |
| Creatinine (μmol/L) - Median (IQR)                   | 85.0 (69.0, 115.0)   | 84.0 (68.0, 114.0)   | 87.0 (70.0, 121.0)   | 82.0 (66.0, 107.0)   | 0.036  |
| Missing, n                                           | 28                   | 10                   | 11                   | 7                    |        |

Confidential

**Table 2.** COVID-19 therapies during the hospital course.

| Variable, n (%)     | All (n=1337)    | Wave          |                |               | P      |
|---------------------|-----------------|---------------|----------------|---------------|--------|
|                     |                 | 1st (n=520)   | 2nd (n=572)    | 3rd (n=245)   |        |
| Antiviral agent     | 211/1330 (15.9) | 72/516 (14.0) | 106/569 (18.6) | 33/245 (13.5) | 0.057  |
| Lopinavir/Ritonavir | 13/1330 (1.0)   | 13/516 (2.5)  | 0/569 (0.0)    | 0/245 (0.0)   | <0.001 |
| Remdesivir          | 128/1330 (9.6)  | 8/516 (1.6)   | 96/569 (16.9)  | 24/245 (9.8)  | <0.001 |
| Antibiotic          | 1119 (83.7)     | 434 (83.5)    | 486 (85.0)     | 199 (81.2)    | 0.408  |
| Corticosteroid      | 882 (66.0)      | 160 (30.8)    | 499 (87.2)     | 223 (91.0)    | <0.001 |
| Dexamethasone       | 756 (56.5)      | 56 (10.8)     | 482 (84.3)     | 218 (89.0)    | <0.001 |
| Antifungal agent    | 73 (5.5)        | 34 (6.5)      | 23 (4.0)       | 16 (6.5)      | 0.135  |

P value was based on Chi-square test or Fisher's exact test as appropriate.

Confidential

**Table 3.** Outcomes of patients admitted to hospital with acute COVID-19 overall, and according to waves 1, 2 and 3.

| Variable                                            | All (n=1337)    | Wave             |                 |                 |
|-----------------------------------------------------|-----------------|------------------|-----------------|-----------------|
|                                                     |                 | 1st (n=520)      | 2nd (n=572)     | 3rd (n=245)     |
| 28-day mortality, n (%)                             | 207 (15.5)      | 95 (18.3)        | 93 (16.3)       | 19 (7.8)        |
| In-hospital death, n (%)                            | 238 (17.8)      | 111 (21.3)       | 103 (18.0)      | 24 (9.8)        |
| Admitted to ICU, n (%)                              | 495/1336 (37.1) | 201/520 (38.7)   | 215/572 (37.6)  | 79/244 (32.4)   |
| Organ support while hospitalized, n (%)             |                 |                  |                 |                 |
| Invasive mechanical ventilation                     | 281/1337 (21.0) | 130/520 (25.0)   | 116/572 (20.3)  | 35/245 (14.3)   |
| RRT or dialysis                                     | 68/1320 (5.2)   | 33/511 (6.5)     | 30/567 (5.3)    | 5/242 (2.1)     |
| Vasopressors                                        | 285/1337 (21.3) | 120/520 (23.1)   | 123/572 (21.5)  | 42/245 (17.1)   |
| Organ support during first 14 days, n (%)           |                 |                  |                 |                 |
| Invasive mechanical ventilation                     | 275/1337 (20.6) | 127/520 (24.4)   | 115/572 (20.1)  | 33/245 (13.5)   |
| RRT or dialysis                                     | 55/1315 (4.2)   | 26/508 (5.1)     | 24/565 (4.2)    | 5/242 (2.1)     |
| Vasopressors                                        | 278/1335 (20.8) | 116/520 (22.3)   | 121/571 (21.2)  | 41/244 (16.8)   |
| DAF invasive mechanical ventilation - first 14 days |                 |                  |                 |                 |
| Mean (SD)                                           | 10.8 (5.4)      | 10.0 (5.9)       | 11.0 (5.3)      | 12.2 (4.3)      |
| Unknown, n                                          | 7               | 2                | 2               | 3               |
| DAF RRT- first 14 days                              |                 |                  |                 |                 |
| Mean (SD)                                           | 12.2 (4.6)      | 11.8 (5.0)       | 12.3 (4.5)      | 13.1 (3.4)      |
| Unknown, n                                          | 18              | 11               | 5               | 2               |
| DAF Vasopressors - first 14 days                    |                 |                  |                 |                 |
| Mean (SD)                                           | 11.3 (5.1)      | 10.7 (5.5)       | 11.3 (5.0)      | 12.4 (3.9)      |
| Unknown, n                                          | 6               | 2                | 2               | 2               |
| Hospital length of stay*                            |                 |                  |                 |                 |
| Median (IQR)                                        | 9.0 (5.0, 19.0) | 13.0 (7.0, 25.0) | 8.0 (5.0, 15.0) | 9.0 (5.0, 15.0) |
| Range                                               | (2.0, 135.0)    | (2.0, 135.0)     | (2.0, 77.0)     | (2.0, 66.0)     |

\* Among those who discharged alive.

1  
2  
3  
4  
5  
6  
7  
8  
9  
10  
11  
12  
13  
14  
15  
16  
17  
18  
19  
20  
21  
22  
23  
24  
25  
26  
27  
28  
29  
30  
31  
32  
33  
34  
35  
36  
37  
38  
39  
40  
41  
42  
43  
44  
45  
46  
47  
48  
49  
50  
51  
52  
53  
54  
55  
56  
57  
58  
59  
60

**Figure 1.** Definition of waves 1, 2 and 3 and number of patients enrolled in each wave by province.

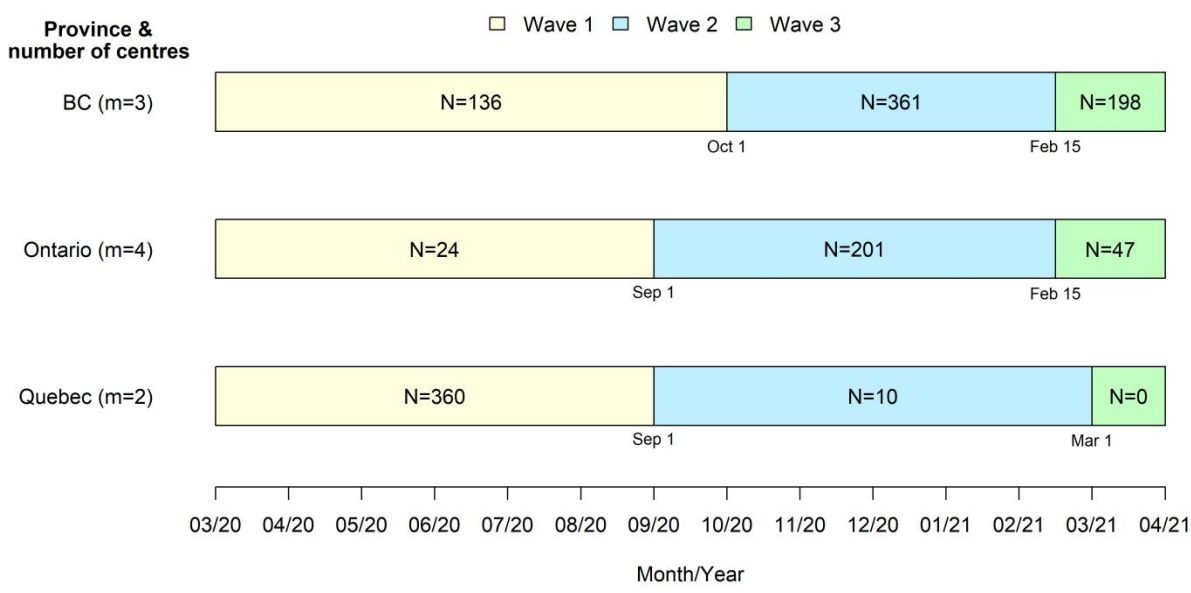

Confidential



**Figure 2.** Comparison of outcomes between waves by regression analysis

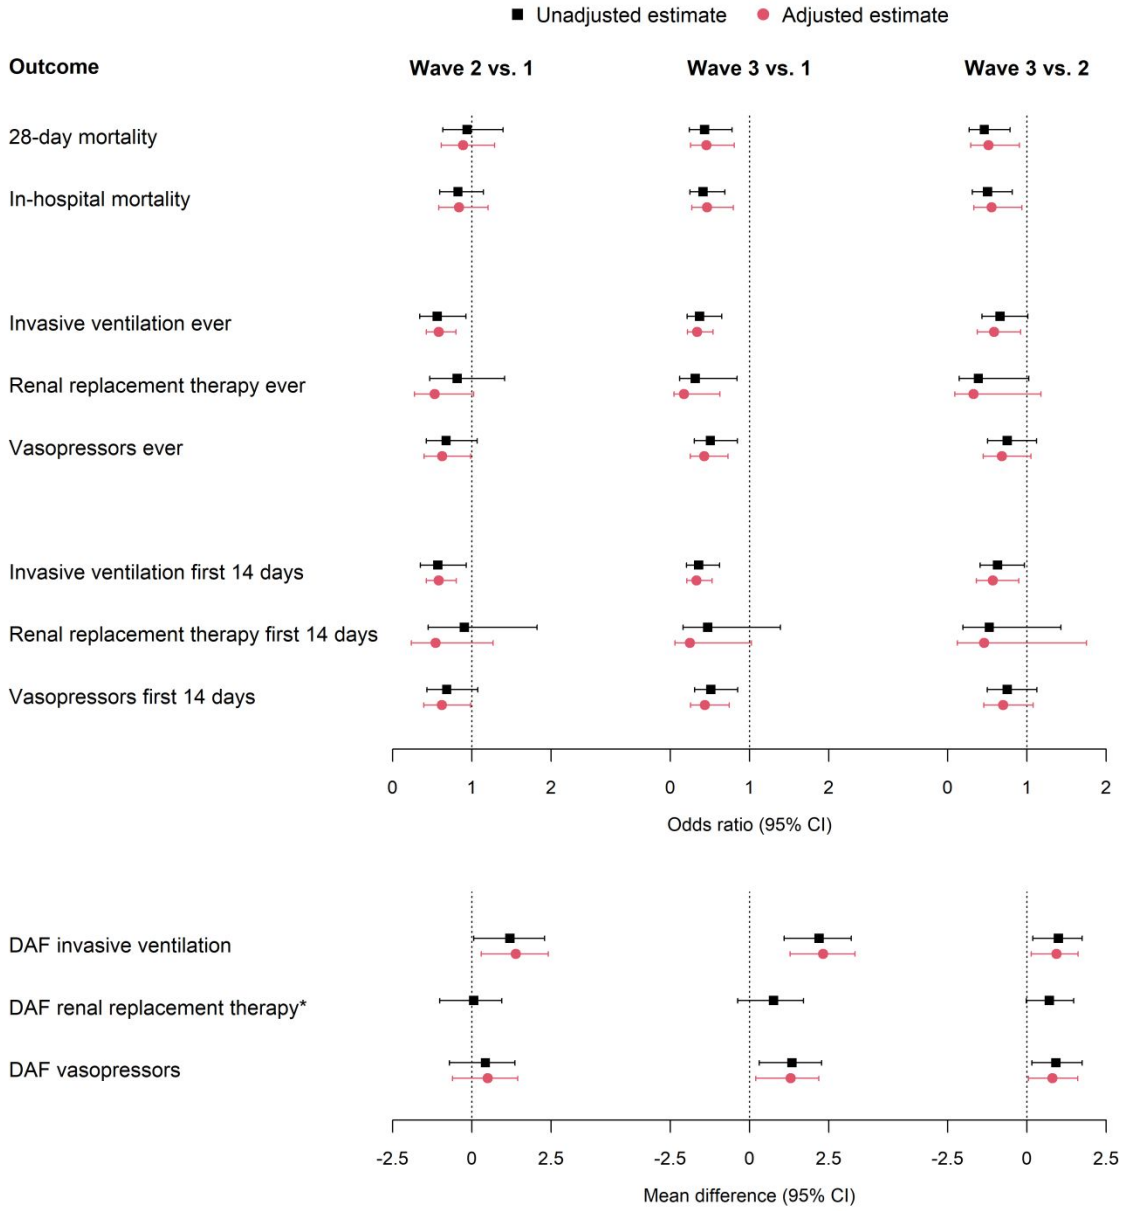

\* Adjusted regression analysis was not feasible numerically as too few patients used RRT during the first 14 days.

1  
2  
3 **ACKNOWLEDGEMENTS**

4 We thank the patients and families who participated in the ARBs CORONA I study which has  
5  
6 increased our understanding of COVID-19. We also thank the many dedicated clinicians  
7  
8 (doctors, nurses, therapists and others) who cared for these patients and comforted their families.  
9  
10 We also thank the investigators in the ARBs CORONA I study for their ongoing support and  
11  
12  
13 tireless collaboration (Appendix S2).  
14  
15  
16  
17  
18  
19  
20  
21  
22  
23  
24  
25  
26  
27  
28  
29  
30  
31  
32  
33  
34  
35  
36  
37  
38  
39  
40  
41  
42  
43  
44  
45  
46  
47  
48  
49  
50  
51  
52  
53  
54  
55  
56  
57  
58  
59  
60

Confidential

### Authors' Contributions

TL performed the analysis, drafted the manuscript and contributed to the CIHR grant that led to this manuscript. MPC, DCV, TCL, KCT, BWW, DS, JHB, KRW, FL, RF, DM, JS, DMP, JCM, KDB and SM contributed to the manuscript and to the CIHR grant that led to this manuscript. GH, AM, NF, PKM, GH, KD and GR contributed to the manuscript. JAR wrote the CIHR grant that led to this manuscript, the first draft and the final drafts of this manuscript.

### Competing Interests Statement

Dr. Russell reports patents owned by the University of British Columbia (UBC) that are related to the use of PCSK9 inhibitor(s) in sepsis, and related to the use of vasopressin in septic shock and a patent owned by Ferring for use of selepressin in septic shock. Dr. Russell is an inventor on these patents. Dr. Russell was a founder, Director and shareholder in Cyon Therapeutics Inc. and is a shareholder in Molecular You Corp.

Dr. Russell reports receiving consulting fees in the last 3 years from:

1. Asahi Kesai Pharmaceuticals of America (AKPA)(was developing recombinant thrombomodulin in sepsis).
2. SIB Therapeutics LLC (developing a sepsis drug).
3. Ferring Pharmaceuticals (manufactures vasopressin and developing selepressin).

Dr. Russell is no longer actively consulting for the following:

1  
2  
3 4. La Jolla Pharmaceuticals (developing angiotensin II; Dr. Russell chaired the DSMB of a  
4  
5 trial of angiotensin II from 2015 - 2017).

6  
7  
8 5. PAR Pharma (sells prepared bags of vasopressin).  
9  
10

11  
12 Dr. Russell reports having received an investigator-initiated grant from Grifols (entitled “Is HBP  
13  
14 a mechanism of albumin’s efficacy in human septic shock?”) that was provided to and  
15  
16 administered by UBC.  
17  
18  
19  
20

21 All other authors state that they have no competing interests.  
22  
23  
24  
25  
26  
27  
28  
29  
30  
31  
32  
33  
34  
35  
36  
37  
38  
39  
40  
41  
42  
43  
44  
45  
46  
47  
48  
49  
50  
51  
52  
53  
54  
55  
56  
57  
58  
59  
60

Confidential

## REFERENCES

1. Pairo-Castineira E, Clohisey S, Klaric L, Bretherick AD, Rawlik K, Pasko D, et al. Genetic mechanisms of critical illness in COVID-19. *Nature*. 2021;591(7848):92-8.
2. Russell JA, Marshall JC, Slutsky A, Murthy S, Sweet D, Lee T, et al. Study protocol for a multicentre, prospective cohort study of the association of angiotensin II type 1 receptor blockers on outcomes of coronavirus infection. *BMJ Open*. 2020;10(12):e040768.
3. Chen N, Zhou M, Dong X, Qu J, Gong F, Han Y, et al. Epidemiological and clinical characteristics of 99 cases of 2019 novel coronavirus pneumonia in Wuhan, China: a descriptive study. *Lancet*. 2020.
4. Huang C, Wang Y, Li X, Ren L, Zhao J, Hu Y, et al. Clinical features of patients infected with 2019 novel coronavirus in Wuhan, China. *Lancet*. 2020.
5. Wang D, Hu B, Hu C, Zhu F, Liu X, Zhang J, et al. Clinical Characteristics of 138 Hospitalized Patients With 2019 Novel Coronavirus-Infected Pneumonia in Wuhan, China. *JAMA*. 2020.
6. Russell JA, Lee T, Singer J, De Backer D, Annane D. Days alive and free as an alternative to a mortality outcome in pivotal vasopressor and septic shock trials. *J Crit Care*. 2018;47:333-7.
7. Group RC, Horby P, Lim WS, Emberson JR, Mafham M, Bell JL, et al. Dexamethasone in Hospitalized Patients with Covid-19. *N Engl J Med*. 2021;384(8):693-704.
8. Tomazini BM, Maia IS, Cavalcanti AB, Berwanger O, Rosa RG, Veiga VC, et al. Effect of Dexamethasone on Days Alive and Ventilator-Free in Patients With Moderate or Severe Acute Respiratory Distress Syndrome and COVID-19: The CoDEX Randomized Clinical Trial. *JAMA*. 2020;324(13):1307-16.
9. Soriano V, de Mendoza C, Gomez-Gallego F, Corral O, Barreiro P. Third wave of COVID-19 in Madrid, Spain. *Int J Infect Dis*. 2021;107:212-4.
10. Fan G, Yang Z, Lin Q, Zhao S, Yang L, He D. Decreased Case Fatality Rate of COVID-19 in the Second Wave: A study in 53 countries or regions. *Transbound Emerg Dis*. 2021;68(2):213-5.
11. Domingo P, Pomar V, Mur I, Castellvi I, Corominas H, de Benito N. Not all COVID-19 pandemic waves are alike. *Clin Microbiol Infect*. 2021;27(7):1040 e7- e10.
12. Ioannidis JPA, Axfors C, Contopoulos-Ioannidis DG. Second versus first wave of COVID-19 deaths: Shifts in age distribution and in nursing home fatalities. *Environ Res*. 2021;195:110856.
13. Radovanovic D, Santus P, Coppola S, Saad M, Pini S, Giuliani F, et al. Characteristics, outcomes and global trends of respiratory support in patients hospitalized with COVID-19 pneumonia: a scoping review. *Minerva Anesthesiol*. 2021.
14. Iftimie S, Lopez-Azcona AF, Vallverdu I, Hernandez-Flix S, de Febrer G, Parra S, et al. First and second waves of coronavirus disease-19: A comparative study in hospitalized patients in Reus, Spain. *PLoS One*. 2021;16(3):e0248029.
15. Salyer SJ, Maeda J, Sembuche S, Kebede Y, Tshangela A, Moussif M, et al. The first and second waves of the COVID-19 pandemic in Africa: a cross-sectional study. *Lancet*. 2021;397(10281):1265-75.
16. Seong H, Hyun HJ, Yun JG, Noh JY, Cheong HJ, Kim WJ, et al. Comparison of the second and third waves of the COVID-19 pandemic in South Korea: Importance of early public health intervention. *Int J Infect Dis*. 2021;104:742-5.

17. Coccia M. The impact of first and second wave of the COVID-19 pandemic in society: comparative analysis to support control measures to cope with negative effects of future infectious diseases. *Environ Res.* 2021;197:111099.
18. Ko K, Nagashima S, E B, Ouoba S, Akita T, Sugiyama A, et al. Molecular characterization and the mutation pattern of SARS-CoV-2 during first and second wave outbreaks in Hiroshima, Japan. *PLoS One.* 2021;16(2):e0246383.
19. Chan WM, Ip JD, Chu AW, Tse H, Tam AR, Li X, et al. Phylogenomic analysis of COVID-19 summer and winter outbreaks in Hong Kong: An observational study. *Lancet Reg Health West Pac.* 2021;10:100130.
20. Barallat J, Fernandez-Rivas G, Quirant-Sanchez B, Gonzalez V, Dolade M, Martinez-Caceres E, et al. Seroprevalence of SARS-CoV-2 IgG specific antibodies among healthcare workers in the Northern Metropolitan Area of Barcelona, Spain, after the first pandemic wave. *PLoS One.* 2020;15(12):e0244348.
21. Utrero-Rico A, Ruiz-Hornillos J, Gonzalez-Cuadrado C, Rita CG, Almoguera B, Minguez P, et al. IL-6-based mortality prediction model for COVID-19: Validation and update in multicenter and second wave cohorts. *J Allergy Clin Immunol.* 2021;147(5):1652-61 e1.

## Supplement

### Appendix S1

We enrolled 2088 patients in ARBs CORONA I. The following patients were excluded from the current analysis.

- Acute COVID-19 readmissions (n=37)
- Emergency Room admissions without hospitalization (n=125)
- Patients admitted to hospital but not due to acute COVID-19 (n=220)
- Patients with unknown discharge outcome or currently still hospitalized (n=19)
- Patients from the Alberta site (n=350)

Alberta site was different from the other participating sites in that it only enrolled patients who were admitted to ICU. Because the percentage of data from Alberta in ARBs CORONA I varied across waves (13%, 28% and 17% in waves 1, 2 and 3 respectively), the inclusion of Alberta site would thus confound and skew the results (for example, with the inclusion of Alberta data, ICU admission rate became 47%, 55% and 44% in waves 1, 2 and 3 respectively).

**Appendix S2****British Columbia:**

St. Paul's Hospital, Vancouver, BC, Can.: Drs. James A. Russell, Nadia Khan, John Boyd, Keith R. Walley, Anita Palepu, Adeera Levin. Centre for Health Evaluation and Outcomes Science (CHEOS), St. Paul's Hospital, Vancouver, BC, Can.: Drs. Joel Singer, Terry Lee. British Columbia Women's and Children's Hospital, Vancouver, BC, Can.: Dr. Srinivas Murthy. Vancouver General Hospital, Vancouver, BC, Can.: Drs. David Sweet, Karen Tran. Royal Columbian Hospital, New Westminster, BC, Can.: Dr Steve Reynolds. Surrey Memorial Hospital, Surrey, BC, Can.: Dr. Greg Haljan. British Columbia Centres for Disease Control: Dr. David Patrick.

**Province of Quebec (PQ):**

CHUS, Sherbrooke, PQ, Can.: Dr. Francois Lamontagne. McGill University Health Centre, Montreal, PQ, Can.: Dr. Matthew P. Cheng, Dr. Todd C. Lee.

**Ontario:**

Sunnybrook Hospital, Toronto, Ont. Can.: Dr. Robert Fowler. Mount Sinai Hospital, Toronto, Ont. Can.: Dr. Allison McGeer. St Michael's Hospital, Toronto, Ont., Can.: Drs. John Marshall, Art Slutsky. Kingston General Hospital, Kingston, Ont., Can.: Drs. David Maslove, Santiago Perez Patrigeon. University of Ottawa, Ottawa, Ont., Can.: Dr. Kevin Burns.

**Manitoba:**

Winnipeg Health Sciences Centre, Winnipeg, Man., Can.: Dr. Anand Kumar.

**Alberta:**

Foothills Hospital, Calgary, Alberta, Can.: Dr. Brent Winston.  
University of Alberta, Edmonton, Alta., Can.: Dr. Oleksa Rewa.



**USA:**

University of Pennsylvania, Philadelphia, Pa., USA: Dr. Michael Harhay.

The following persons and institutions participated in the ARBs CORONA I Study: **Steering Committee** – J.A. Russell (chair), Genevieve Rocheleau (former project manager), Puneet Mann (project manager), D. Sweet, G. Haljan, M. Cheng, D. C. Vinh, T. Lee, F. Lamontagne, B. Winston, O. Rewa, J. Marshall, A. McGeer, R. Fowler, David Maslove, Santiago Perez Patrigeon. **Management Committee** - J.A. Russell (chair), Genevieve Rocheleau (project manager), Puneet Mann (project manager), Karen Tran, Joel Singer. **Data Management** – J. Singer, T. Lee.

**CLINICAL CENTERS AND ARBs CORONA I INVESTIGATORS:**

**Canada. British Columbia:** *St. Paul's Hospital* (Coordinating Centre) - J.A. Russell, K.R. Walley, J. Boyd, T. Lee, J. Singer. *Vancouver General Hospital* - D. Sweet, K. Tran. *Royal Columbian Hospital* – S. Reynolds. *Surrey Memorial Hospital* - G. Haljan. **Quebec:** *McGill University Centre Hospital* – M.P. Cheng, D.C. Vinh, TC Lee. *Sherbrooke* – F. Lamontagne. **Alberta:** *Calgary General Hospital* – B. Winston, *University of Alberta* - O. Rewa. **Ontario:** *St. Michael's Hospital* – J. Marshall, A. Slutsky. *Mount Sinai Hospital* – A. McGeer, V. Sivanantham. *Sunnybrook and Women's College Health Science Centre* – R. Fowler. *Kingston General Hospital* - David Maslove, Santiago Perez Patrigeon.

**Table E1** – Mortality in patients hospitalized with acute COVID-19 in unadjusted and adjusted analyses.

| Variable                                                | 28-day mortality    |       |                     |        | In-hospital death   |        |                     |        |
|---------------------------------------------------------|---------------------|-------|---------------------|--------|---------------------|--------|---------------------|--------|
|                                                         | Unadjusted analysis |       | Adjusted analysis   |        | Unadjusted analysis |        | Adjusted analysis   |        |
|                                                         | Odds ratio (95% CI) | P     | Odds ratio (95% CI) | P      | Odds ratio (95% CI) | P      | Odds ratio (95% CI) | P      |
| Wave                                                    |                     |       |                     |        |                     |        |                     |        |
| 2 vs 1                                                  | 0.94 (0.63, 1.39)   | 0.750 | 0.89 (0.61, 1.29)   | 0.528  | 0.82 (0.59, 1.14)   | 0.246  | 0.84 (0.58, 1.20)   | 0.333  |
| 3 vs 1                                                  | 0.43 (0.24, 0.78)   | 0.005 | 0.46 (0.26, 0.81)   | 0.007  | 0.41 (0.25, 0.69)   | <0.001 | 0.46 (0.27, 0.80)   | 0.005  |
| 3 vs 2                                                  | 0.46 (0.27, 0.79)   | 0.004 | 0.52 (0.29, 0.91)   | 0.022  | 0.50 (0.31, 0.81)   | 0.005  | 0.56 (0.33, 0.94)   | 0.028  |
| Male                                                    |                     |       | 1.06 (0.74, 1.52)   | 0.733  |                     |        | 1.29 (0.92, 1.82)   | 0.139  |
| Age (per 10 years increase)                             |                     |       | 2.23 (1.91, 2.61)   | <0.001 |                     |        | 1.99 (1.73, 2.30)   | <0.001 |
| SBP (per 10mm Hg increase)                              |                     |       | 0.93 (0.86, 1.00)   | 0.058  |                     |        | 0.93 (0.87, 1.00)   | 0.051  |
| Chronic kidney disease                                  |                     |       | 0.94 (0.56, 1.59)   | 0.823  |                     |        | 0.88 (0.53, 1.45)   | 0.609  |
| Chronic cardiac disease                                 |                     |       | 0.92 (0.63, 1.33)   | 0.642  |                     |        | 0.97 (0.68, 1.39)   | 0.882  |
| Diabetes                                                |                     |       | 1.57 (1.10, 2.25)   | 0.013  |                     |        | 1.43 (1.02, 2.00)   | 0.037  |
| Hypertension                                            |                     |       | 0.85 (0.58, 1.25)   | 0.403  |                     |        | 0.93 (0.65, 1.33)   | 0.683  |
| Heart rate (per 10 beats/minute increase)               |                     |       | 1.18 (1.08, 1.29)   | <0.001 |                     |        | 1.11 (1.02, 1.21)   | 0.014  |
| Creatinine (per log $\mu\text{mol/L}$ increase)         |                     |       | 1.86 (1.25, 2.75)   | 0.002  |                     |        | 1.91 (1.32, 2.76)   | <0.001 |
| Oxygen saturation - SaO <sub>2</sub> (per 5 % increase) |                     |       | 0.79 (0.71, 0.88)   | <0.001 |                     |        | 0.80 (0.72, 0.89)   | <0.001 |

Odds ratio of <1 implied **less likely** to experience the outcome.

**Table E2.** Use of mechanical ventilation, renal replacement therapy (RRT) and vasopressors in patients hospitalized with acute COVID-19 in unadjusted and adjusted analyses.

| Variable                                                | Mechanical ventilation - while hospitalized |        |                     |        | RRT - while hospitalized |       |                     |        | Use of vasopressors - while hospitalized |       |                   |        |
|---------------------------------------------------------|---------------------------------------------|--------|---------------------|--------|--------------------------|-------|---------------------|--------|------------------------------------------|-------|-------------------|--------|
|                                                         | Unadjusted analysis                         |        | Adjusted analysis   |        | Unadjusted analysis      |       | Adjusted analysis   |        | Unadjusted analysis                      |       | Adjusted analysis |        |
|                                                         | Odds ratio (95% CI)                         | P      | Odds ratio (95% CI) | P      | Odds ratio (95% CI)      | P     | Odds ratio (95% CI) | P      | Diff (95% CI)                            | P     | Diff (95% CI)     | P      |
| Wave                                                    |                                             |        |                     |        |                          |       |                     |        |                                          |       |                   |        |
| 2 vs 1                                                  | 0.56 (0.34, 0.93)                           | 0.023  | 0.58 (0.42, 0.80)   | <0.001 | 0.81 (0.47, 1.41)        | 0.463 | 0.53 (0.28, 1.02)   | 0.058  | 0.67 (0.43, 1.07)                        | 0.092 | 0.63 (0.40, 0.98) | 0.042  |
| 3 vs 1                                                  | 0.37 (0.21, 0.65)                           | <0.001 | 0.34 (0.22, 0.54)   | <0.001 | 0.32 (0.12, 0.84)        | 0.022 | 0.17 (0.05, 0.63)   | 0.008  | 0.51 (0.30, 0.85)                        | 0.009 | 0.43 (0.25, 0.73) | 0.002  |
| 3 vs 2                                                  | 0.66 (0.43, 1.01)                           | 0.056  | 0.59 (0.38, 0.92)   | 0.021  | 0.39 (0.15, 1.03)        | 0.056 | 0.33 (0.09, 1.18)   | 0.087  | 0.75 (0.51, 1.12)                        | 0.165 | 0.69 (0.45, 1.05) | 0.084  |
| Male                                                    |                                             |        | 1.44 (1.05, 1.96)   | 0.022  |                          |       | 1.11 (0.57, 2.17)   | 0.764  |                                          |       | 1.61 (1.18, 2.21) | 0.003  |
| Age (per 10 years increase)                             |                                             |        | 0.83 (0.75, 0.92)   | <0.001 |                          |       | 0.73 (0.57, 0.92)   | 0.008  |                                          |       | 0.91 (0.82, 1.01) | 0.071  |
| SBP (per 10mm Hg increase)                              |                                             |        | 1.01 (0.94, 1.07)   | 0.855  |                          |       | 1.14 (1.01, 1.30)   | 0.038  |                                          |       | 0.94 (0.88, 1.00) | 0.063  |
| Chronic kidney disease                                  |                                             |        | 0.55 (0.31, 0.97)   | 0.039  |                          |       | 0.41 (0.16, 1.09)   | 0.073  |                                          |       | 0.49 (0.28, 0.87) | 0.014  |
| Chronic cardiac disease                                 |                                             |        | 0.86 (0.60, 1.24)   | 0.425  |                          |       | 1.82 (0.91, 3.65)   | 0.091  |                                          |       | 0.97 (0.67, 1.39) | 0.858  |
| Diabetes                                                |                                             |        | 1.49 (1.09, 2.04)   | 0.013  |                          |       | 1.23 (0.65, 2.33)   | 0.533  |                                          |       | 1.31 (0.96, 1.80) | 0.091  |
| Hypertension                                            |                                             |        | 1.20 (0.86, 1.69)   | 0.290  |                          |       | 2.69 (1.15, 6.27)   | 0.022  |                                          |       | 1.14 (0.81, 1.59) | 0.460  |
| Heart rate (per 10 beats/minute increase)               |                                             |        | 1.05 (0.98, 1.13)   | 0.174  |                          |       | 1.01 (0.87, 1.18)   | 0.879  |                                          |       | 1.08 (1.00, 1.16) | 0.041  |
| Creatinine (per log $\mu\text{mol/L}$ increase)         |                                             |        | 1.52 (1.07, 2.16)   | 0.019  |                          |       | 8.97 (4.88, 16.49)  | <0.001 |                                          |       | 1.71 (1.21, 2.43) | 0.003  |
| Oxygen saturation - SaO <sub>2</sub> (per 5 % increase) |                                             |        | 0.75 (0.68, 0.82)   | <0.001 |                          |       | 0.88 (0.73, 1.04)   | 0.141  |                                          |       | 0.75 (0.68, 0.83) | <0.001 |

Odds ratio of <1 implied **less likely** to experience the outcome.

**Table E3.** Use of mechanical ventilation, renal replacement therapy (RRT) and vasopressors over 14 days in patients hospitalized with acute COVID-19 in unadjusted and adjusted analyses.

| Variable                                                | Mechanical ventilation - first 14 days |        |                     |        | RRT- first 14 days  |       |                     |        | Use of vasopressors - first 14 days |       |                   |        |
|---------------------------------------------------------|----------------------------------------|--------|---------------------|--------|---------------------|-------|---------------------|--------|-------------------------------------|-------|-------------------|--------|
|                                                         | Unadjusted analysis                    |        | Adjusted analysis   |        | Unadjusted analysis |       | Adjusted analysis   |        | Unadjusted analysis                 |       | Adjusted analysis |        |
|                                                         | Odds ratio (95% CI)                    | P      | Odds ratio (95% CI) | P      | Odds ratio (95% CI) | P     | Odds ratio (95% CI) | P      | Diff (95% CI)                       | P     | Diff (95% CI)     | P      |
| Wave                                                    |                                        |        |                     |        |                     |       |                     |        |                                     |       |                   |        |
| 2 vs 1                                                  | 0.57 (0.35, 0.93)                      | 0.024  | 0.58 (0.42, 0.80)   | <0.001 | 0.90 (0.45, 1.82)   | 0.778 | 0.54 (0.23, 1.27)   | 0.157  | 0.68 (0.43, 1.07)                   | 0.097 | 0.62 (0.39, 0.98) | 0.042  |
| 3 vs 1                                                  | 0.36 (0.21, 0.62)                      | <0.001 | 0.33 (0.21, 0.53)   | <0.001 | 0.48 (0.16, 1.39)   | 0.175 | 0.25 (0.06, 1.02)   | 0.054  | 0.51 (0.31, 0.85)                   | 0.010 | 0.44 (0.26, 0.74) | 0.002  |
| 3 vs 2                                                  | 0.63 (0.41, 0.97)                      | 0.036  | 0.57 (0.36, 0.90)   | 0.016  | 0.53 (0.19, 1.43)   | 0.207 | 0.46 (0.12, 1.75)   | 0.255  | 0.75 (0.50, 1.13)                   | 0.166 | 0.70 (0.46, 1.08) | 0.108  |
| Male                                                    |                                        |        | 1.42 (1.04, 1.94)   | 0.028  |                     |       | 0.97 (0.46, 2.02)   | 0.927  |                                     |       | 1.59 (1.16, 2.17) | 0.004  |
| Age (per 10 years increase)                             |                                        |        | 0.83 (0.75, 0.93)   | <0.001 |                     |       | 0.66 (0.51, 0.86)   | 0.002  |                                     |       | 0.92 (0.83, 1.02) | 0.109  |
| SBP (per 10mm Hg increase)                              |                                        |        | 1.00 (0.94, 1.07)   | 0.897  |                     |       | 1.14 (0.99, 1.31)   | 0.072  |                                     |       | 0.94 (0.88, 1.00) | 0.051  |
| Chronic kidney disease                                  |                                        |        | 0.52 (0.29, 0.93)   | 0.028  |                     |       | 0.58 (0.21, 1.65)   | 0.308  |                                     |       | 0.47 (0.26, 0.84) | 0.011  |
| Chronic cardiac disease                                 |                                        |        | 0.84 (0.58, 1.21)   | 0.348  |                     |       | 2.22 (1.03, 4.80)   | 0.042  |                                     |       | 0.95 (0.66, 1.37) | 0.785  |
| Diabetes                                                |                                        |        | 1.48 (1.08, 2.03)   | 0.015  |                     |       | 1.00 (0.49, 2.06)   | 0.992  |                                     |       | 1.32 (0.96, 1.81) | 0.090  |
| Hypertension                                            |                                        |        | 1.18 (0.84, 1.66)   | 0.340  |                     |       | 3.36 (1.25, 8.98)   | 0.016  |                                     |       | 1.09 (0.77, 1.53) | 0.626  |
| Heart rate (per 10 beats/minute increase)               |                                        |        | 1.05 (0.98, 1.14)   | 0.160  |                     |       | 0.98 (0.83, 1.16)   | 0.823  |                                     |       | 1.08 (1.01, 1.17) | 0.034  |
| Creatinine (per log $\mu\text{mol/L}$ increase)         |                                        |        | 1.57 (1.11, 2.24)   | 0.011  |                     |       | 7.54 (4.00, 14.19)  | <0.001 |                                     |       | 1.77 (1.25, 2.52) | 0.001  |
| Oxygen saturation - SaO <sub>2</sub> (per 5 % increase) |                                        |        | 0.74 (0.68, 0.82)   | <0.001 |                     |       | 0.88 (0.72, 1.08)   | 0.221  |                                     |       | 0.75 (0.68, 0.82) | <0.001 |

Odds ratio of <1 implied **less likely** to experience the outcome.

**Table E4.** Days alive and free of organ support by zero-one inflated beta regression in patients hospitalized with acute COVID-19.

| Variable                                                | DAF mechanical ventilation - first 14 days |        |                      |        | DAF RRT - first 14 days |       |                    |   | DAF vasopressors - first 14 days |        |                      |        |
|---------------------------------------------------------|--------------------------------------------|--------|----------------------|--------|-------------------------|-------|--------------------|---|----------------------------------|--------|----------------------|--------|
|                                                         | Unadjusted analysis                        |        | Adjusted analysis    |        | Unadjusted analysis     |       | Adjusted analysis* |   | Unadjusted analysis              |        | Adjusted analysis    |        |
|                                                         | Mean diff (95% CI)                         | P      | Mean diff (95% CI)   | P      | Mean diff (95% CI)      | P     | Mean diff (95% CI) | P | Mean diff (95% CI)               | P      | Mean diff (95% CI)   | P      |
| Wave                                                    |                                            |        |                      |        |                         |       |                    |   |                                  |        |                      |        |
| 2 vs 1                                                  | 1.20 (0.06, 2.29)                          | <0.001 | 1.39 (0.29, 2.41)    | <0.001 | 0.06 (-1.01, 0.94)      | 0.910 | -                  | - | 0.43 (-0.71, 1.35)               | 0.177  | 0.49 (-0.61, 1.44)   | 0.111  |
| 3 vs 1                                                  | 2.20 (1.09, 3.21)                          | <0.001 | 2.32 (1.28, 3.33)    | <0.001 | 0.76 (-0.37, 1.70)      | 0.141 | -                  | - | 1.34 (0.31, 2.27)                | <0.001 | 1.30 (0.20, 2.19)    | <0.001 |
| 3 vs 2                                                  | 1.00 (0.19, 1.74)                          | 0.013  | 0.94 (0.14, 1.62)    | 0.017  | 0.71 (-0.02, 1.47)      | 0.063 | -                  | - | 0.91 (0.16, 1.74)                | 0.014  | 0.81 (0.05, 1.60)    | 0.026  |
| Male                                                    |                                            |        | -0.38 (-0.93, 0.22)  | 0.185  |                         |       | -                  | - |                                  |        | -0.25 (-0.79, 0.31)  | 0.365  |
| Age (per 10 years increase)                             |                                            |        | -0.57 (-0.80, -0.35) | <0.001 |                         |       | -                  | - |                                  |        | -0.73 (-0.95, -0.54) | <0.001 |
| SBP (per 10mm Hg increase)                              |                                            |        | 0.12 (-0.01, 0.24)   | 0.066  |                         |       | -                  | - |                                  |        | 0.12 (-0.00, 0.24)   | 0.043  |
| Chronic kidney disease                                  |                                            |        | 0.30 (-0.78, 1.16)   | 0.469  |                         |       | -                  | - |                                  |        | 0.22 (-0.76, 1.11)   | 0.552  |
| Chronic cardiac disease                                 |                                            |        | 0.13 (-0.62, 0.81)   | 0.689  |                         |       | -                  | - |                                  |        | 0.02 (-0.67, 0.64)   | 0.944  |
| Diabetes                                                |                                            |        | -0.89 (-1.56, -0.23) | 0.004  |                         |       | -                  | - |                                  |        | -0.66 (-1.30, -0.08) | 0.023  |
| Hypertension                                            |                                            |        | 0.27 (-0.39, 0.95)   | 0.344  |                         |       | -                  | - |                                  |        | 0.33 (-0.27, 0.94)   | 0.213  |
| Heart rate (per 10 beats/minute increase)               |                                            |        | -0.28 (-0.45, -0.13) | <0.001 |                         |       | -                  | - |                                  |        | -0.28 (-0.44, -0.13) | <0.001 |
| Creatinine (per log $\mu\text{mol/L}$ increase)         |                                            |        | -0.98 (-1.60, -0.40) | 0.001  |                         |       | -                  | - |                                  |        | -0.96 (-1.53, -0.35) | 0.001  |
| Oxygen saturation - SaO <sub>2</sub> (per 5 % increase) |                                            |        | 0.55 (0.39, 0.73)    | <0.001 |                         |       | -                  | - |                                  |        | 0.45 (0.30, 0.60)    | 0.001  |

\* Adjusted regression analysis was not feasible numerically as too few patients used RRT during the first 14 days and so most DAF values were 0 or 14.

Estimated difference of **>0** implied **more** days alive free of organ support (i.e., better outcome).
